# Supplementary material for: The Performance of Pleural Fluid T-SPOT.TB Assay for Diagnosing Tuberculous Pleurisy in China: A Two-Center Prospective Cohort Study
Source: Front Cell Infect Microbiol. 2019 Jan 30;9:10. doi: 10.3389/fcimb.2019.00010 (PMC6363671; doi:10.3389/fcimb.2019.00010)
Supplement: Supplementary Table 1 — The etiologic distribution of pleural effusion in two cohorts. [file Table_1.XLS]

## Sheet: Sheet1
Supplementary Table 1 The etiologic distribution of pleural effusion in two cohorts
distribution		Wuhan cohort (n = 242)		Guangzhou cohort (n = 236)
plTB		127		112
	confirmed plTB		53		48
	probable plTB		74		64
Non-plTB		91		98
	lung cancer		35		42
	lymphoma		11		12
	breast cancer		8		9
	other cancers		7		7
	parapneumonic effusion		13		9
	Empyema		5		7
	trauma		3		5
	cardiac insufficiency		2		3
	autoimmune diseases		6		4
	hypoproteinemia		1		0
Without final diagnosis		11		12
